# Supplementary material for: The palatability of oral nutritional supplements: before, during, and after chemotherapy
Source: Springer Nature journal article supplement (doi:10.1007/s00520-016-3263-6), 2016-05-24
Supplement: MOESM1 [file 10195354]

## Supplementary material

### Online Resource 1

#### The palatability of oral nutritional supplements: before, during, and after chemotherapy

Irene Ijpma, Remco J. Renken, Gert J. ter Horst, Anna K. L. Reyners\*

\*Top Institute Food and Nutrition, Wageningen, The Netherlands; Department of Medical Oncology, University of Groningen, University Medical Center Groningen, Groningen, The Netherlands. Email: a.k.l.reyners@umcg.nl.

**Table I** Nutritional value of the ONS.

| ONS                                             | Nutritional value per 100 ml |             |                  |         |
|-------------------------------------------------|------------------------------|-------------|------------------|---------|
|                                                 | Kcal                         | Protein (g) | Carbohydrate (g) | Fat (g) |
| Nutricia Nutridrink Protein Vanilla             | 150                          | 10.0        | 15.6             | 5.3     |
| Nutricia Nutridrink Protein Strawberry          | 150                          | 10.0        | 15.6             | 5.3     |
| Nutricia Nutridrink Juice style Apple           | 150                          | 4.0         | 33.5             | -       |
| Nutricia Nutridrink Juice style Orange          | 150                          | 4.0         | 33.5             | -       |
| Nutricia Nutridrink Yoghurt style Vanilla-Lemon | 150                          | 6.0         | 18.7             | 5.8     |
| Nutricia Nutridrink Yoghurt style Peach-Orange  | 150                          | 6.0         | 18.7             | 5.8     |
