# Supplementary material for: The palatability of oral nutritional supplements: before, during, and after chemotherapy
Source: Springer Nature journal article supplement (doi:10.1007/s00520-016-3263-6), 2016-05-24
Supplement: MOESM3 [file 10195354]

### Online Resource 3

#### The palatability of oral nutritional supplements: before, during, and after chemotherapy

Irene IJpma, Remco J. Renken, Gert J. ter Horst, Anna K. L. Reyners\*

\*Top Institute Food and Nutrition, Wageningen, The Netherlands; Department of Medical Oncology, University of Groningen, University Medical Center Groningen, Groningen, The Netherlands. Email: a.k.l.reyners@umcg.nl.

**Table II** Palatability of milk-based vanilla ONS: Estimates of fixed effects.

| Parameter | Estimate | SE   | df    | t     | P-value | 95% CI      |             |
|-----------|----------|------|-------|-------|---------|-------------|-------------|
|           |          |      |       |       |         | Lower bound | Upper bound |
| Intercept | 4.33     | 0.35 | 21.00 | 12.54 | < 0.001 | 3.61        | 5.05        |
| Session 1 | 0        | 0    |       |       |         |             |             |
| Session 2 | -0.66    | 0.34 | 20.03 | -1.93 | 0.067   | -1.38       | 0.05        |
| Session 3 | -0.90    | 0.37 | 20.16 | -2.42 | 0.025   | -1.68       | -0.12       |
| Session 4 | -1.15    | 0.39 | 19.77 | -2.93 | 0.008   | -1.96       | -0.33       |
| Session 5 | -0.69    | 0.29 | 20.18 | -2.34 | 0.030   | -1.30       | -0.08       |

**Table III** Metallic taste of juice-based apple ONS: Estimates of fixed effects.

| Parameter | Estimate | SE   | df    | t    | P-value | 95% CI      |             |
|-----------|----------|------|-------|------|---------|-------------|-------------|
|           |          |      |       |      |         | Lower bound | Upper bound |
| Intercept | 2.14     | 0.35 | 21.00 | 6.09 | <0.001  | 1.41        | 2.87        |
| Session 1 | 0        | 0    |       |      |         |             |             |
| Session 2 | 0.90     | 0.35 | 19.22 | 2.57 | 0.019   | 0.17        | 1.64        |
| Session 3 | 0.44     | 0.39 | 19.93 | 1.14 | 0.267   | -0.37       | 1.25        |
| Session 4 | 0.53     | 0.39 | 18.42 | 1.36 | 0.190   | -0.29       | 1.35        |
| Session 5 | 1.11     | 0.36 | 18.52 | 3.12 | 0.006   | 0.36        | 1.86        |

**Table IV** Metallic taste of juice-based orange ONS: Estimates of fixed effects.

| Parameter | Estimate | SE   | df    | t    | P-value | 95% CI      |             |
|-----------|----------|------|-------|------|---------|-------------|-------------|
|           |          |      |       |      |         | Lower bound | Upper bound |
| Intercept | 2.19     | 0.37 | 21.00 | 5.88 | <0.001  | 1.42        | 2.97        |
| Session 1 | 0        | 0    |       |      |         |             |             |
| Session 2 | 0.68     | 0.34 | 18.73 | 2.00 | 0.061   | -0.03       | 1.38        |
| Session 3 | 1.46     | 0.46 | 19.54 | 3.17 | 0.005   | 0.50        | 2.42        |
| Session 4 | 1.10     | 0.61 | 20.43 | 1.80 | 0.086   | -0.17       | 2.37        |
| Session 5 | 1.05     | 0.49 | 20.44 | 2.13 | 0.045   | 0.02        | 2.08        |
