# Supplementary material for: The palatability of oral nutritional supplements: before, during, and after chemotherapy
Source: Springer Nature journal article supplement (doi:10.1007/s00520-016-3263-6), 2016-05-24
Supplement: MOESM4 [file 10195354]

## Online Resource 4

### The palatability of oral nutritional supplements: before, during, and after chemotherapy

Irene IJpma, Remco J. Renken, Gert J. ter Horst, Anna K. L. Reyners\*

\*Top Institute Food and Nutrition, Wageningen, The Netherlands; Department of Medical Oncology, University of Groningen, University Medical Center Groningen, Groningen, The Netherlands. Email: a.k.l.reyners@umcg.nl.

**Table I** Median (IQR) difference in liking compared to baseline and per cycle among patients.

|                                | <b>T1 – T0<br/>(N = 18)</b> | <b>T2 – T0<br/>(N = 18)</b> | <b>T3 – T0<br/>(N = 16)</b> | <b>T4 – T0<br/>(N = 17)</b> | <b>T3-T1<br/>(N = 15)</b> | <b>T3-T2<br/>(N = 16)</b> |
|--------------------------------|-----------------------------|-----------------------------|-----------------------------|-----------------------------|---------------------------|---------------------------|
| Milk-based<br>Vanilla          | -0.50<br>(-1.25 – 0.25)     | 0.00<br>(-2.00 – 0.00)      | 0.00<br>(-2.00 – 0.00)      | 0.00<br>(-1.50 – 0.00)      | 0.00<br>(-1.00 – 0.00)    | 0.00<br>(-1.00 – 0.00)    |
| Milk-based<br>Strawberry       | 0.00<br>(0 – 1.00)          | -0.50<br>(-1.25 – 1.00)     | 0.00<br>(-1.75 – 0.75)      | 0.00<br>(-1.50 – 1.00)      | -1.00<br>(-2.00 – 0.00)   | 0.00<br>(-1.00 – 1.00)    |
| Juice-based<br>Apple           | -1.00<br>(-2.00 – 1.00)     | 0.00<br>(-1.00 – 1.00)      | 0.50<br>(-1.00 – 1.00)      | 0.00<br>(-0.50 – 1.00)      | 0.00<br>(0.00 – 1.00)     | 0.00<br>(-0.75 – 1.00)    |
| Juice-based<br>Orange          | 0.00<br>(-2.00 – 1.00)      | 0.00<br>(-1.25 – 1.25)      | 0.50<br>(-2.00 – 2.00)      | 1.00<br>(-0.50 – 1.00)      | 0.00<br>(-1.00 – 2.00)    | 0.00<br>(0.00 – 1.00)     |
| Yoghurt-based<br>Vanilla-Lemon | 0.00<br>(-1.25 – 1.00)      | 0.00<br>(-2.00 – 1.25)      | 0.00<br>(-1.00 – 1.00)      | -1.00<br>(-1.00 – 0.00)     | 0.00<br>(-1.00 – 1.00)    | 0.00<br>(-0.75 – 0.00)    |
| Yoghurt-based<br>Peach-Orange  | -1.00<br>(-2.00 – 0.25)     | 0.00<br>(-1.25 – 1.00)      | 0.00<br>(-1.00 – 2.00)      | -1.00<br>(-2.00 – 0.50)     | 0.00<br>(-1.00 – 2.00)    | 0.00<br>(-0.75 – 1.00)    |
